# Supplementary material for: Resting heart rate and risk of left and right heart failure in 0.5 million Chinese adults
Source: HighWire-hosted journal article supplement (doi:10.1136/openhrt-2022-001963), 2022-05-01

## Supplementary material for:

### Resting heart rate and risk of left and right heart failure in 0.5 million Chinese adults

#### Table of contents

|                                                                                                                                                                    |           |
|--------------------------------------------------------------------------------------------------------------------------------------------------------------------|-----------|
| Members of the CKB Collaborative Group                                                                                                                             | Pages 2-3 |
| Supplementary Table: Variables included in the Cox regression analysis                                                                                             | Page 5    |
| Supplementary Figure: Associations of fifths of resting heart rate with heart failure and pulmonary heart disease after excluding participants with prior diseases | Page 5    |

## Members of the China Kadoorie Biobank Collaborative Group

**International Steering Committee:** Junshi Chen<sup>6</sup>, Zhengming Chen (PI)<sup>1,5</sup>, Robert Clarke<sup>1</sup>, Rory Collins<sup>1</sup>, Yu Guo<sup>4</sup>, Liming Li (PI)<sup>5</sup>, Jun Lv<sup>5</sup>, Richard Peto<sup>1</sup>, and Robin Walters<sup>1</sup>.

**International Co-ordinating Centre, Oxford:** Daniel Avery<sup>1</sup>, Derrick Bennett<sup>1</sup>, Ruth Boxall<sup>1</sup>, Fiona Bragg<sup>1</sup>, Sushila Burgess<sup>1</sup>, Kahung Chan<sup>1</sup>, Yumei Chang<sup>1</sup>, Yiping Chen<sup>1,3</sup>, Zhengming Chen<sup>1</sup>, Robert Clarke<sup>1</sup>, Huaidong Du<sup>1</sup>, Zамmy Fairhurst-Hunter<sup>1</sup>, Wei Gan<sup>1</sup>, Simon Gilbert<sup>1</sup>, Alex Hacker<sup>1</sup>, Parisa Hariri<sup>1</sup>, Michael Holmes<sup>1</sup>, Andri Iona<sup>1</sup>, Becky Im<sup>1</sup>, Maria Kakkoura<sup>1</sup>, Christiana Kartsonaki<sup>1,3</sup>, Rene Kerosi<sup>1</sup>, Kuang Lin<sup>1</sup>, Iona Millwood<sup>1</sup>, Qunhua Nie<sup>1</sup>, Alfred Pozaricki<sup>1</sup>, Paul Ryder<sup>1</sup>, Sam Sansome<sup>1</sup>, Dan Schmidt<sup>1</sup>, Rajani Sohoni<sup>1</sup>, Rebecca Stevens<sup>1</sup>, Iain Turnbull<sup>1</sup>, Robin Walters<sup>1</sup>, Lin Wang<sup>1</sup>, Neil Wright<sup>1</sup>, Ling Yang<sup>1</sup>, Xiaoming Yang<sup>1</sup> and Pang Yao<sup>1</sup>.

**National Co-ordinating Centre, Beijing:** Yu Guo<sup>2</sup>, Xiao Han<sup>2</sup>, Can Hou<sup>2</sup>, Chao Liu<sup>2</sup>, Jun Lv<sup>3,4</sup>, Pei Pei<sup>2</sup>, Canqing Yu<sup>3,4</sup> and Liming Li<sup>3,4</sup>.

**Regional Co-ordinating Centres:** **Qingdao** CDC: Zengchang Pang<sup>7</sup>, Ruqin Gao<sup>7</sup>, Shanpeng Li<sup>7</sup>, Shaojie Wang<sup>7</sup>, Yongmei Liu<sup>7</sup>, Ranran Du<sup>7</sup>, Liang Cheng<sup>7</sup>, Xiaocao Tian<sup>7</sup>, Hua Zhang<sup>7</sup>, Yaoming Zhai<sup>7</sup>, Feng Ning<sup>7</sup>, Xiaohui Sun<sup>7</sup>, Feifei Li<sup>7</sup>. **Licang** CDC: Silu Lv<sup>8</sup>, Junzheng Wang<sup>8</sup>, Wei Hou<sup>8</sup>. **Heilongjiang** Provincial CDC: Mingyuan Zou<sup>9</sup>, Shichun Yan<sup>9</sup>, Xue Zhou<sup>9</sup>. **Nangang** CDC: Bo Yu<sup>10</sup>, Yanjie Li<sup>10</sup>, Qinai Xu<sup>10</sup>, Quan Kang<sup>10</sup>, Ziyang Guo<sup>10</sup>. **Hainan** Provincial CDC: Ximin Hu<sup>11</sup>, Jinyan Chen<sup>11</sup>, Xiaohuan Wang<sup>11</sup>. **Meilan** CDC: Min Weng<sup>12</sup>, Zhendong Guo<sup>12</sup>, Shukuan Wu<sup>12</sup>, Yilei Li<sup>12</sup>, Huimei Li<sup>12</sup>. **Jiangsu** Provincial CDC: Ming Wu<sup>13</sup>, Yonglin Zhou<sup>13</sup>, Jinyi Zhou<sup>13</sup>, Ran Tao<sup>13</sup>, Jie Yang<sup>13</sup>, Jian Su<sup>13</sup>. **Suzhou** CDC: Fang Liu<sup>14</sup>, Jun Zhang<sup>14</sup>, Yihe Hu<sup>14</sup>, Yan Lu<sup>14</sup>, Liangcai Ma<sup>14</sup>, Aiyu Tang<sup>14</sup>, Yujie Hua<sup>14</sup>, Jianrong Jin<sup>14</sup>, Jingchao Liu<sup>14</sup>. **Guangxi** Provincial CDC: Zhenzhu Tang<sup>15</sup>, Naying Chen<sup>15</sup>, Duo Liu<sup>15</sup>. **Liuzhou** CDC: Mingqiang Li<sup>16</sup>, Jinhua Meng<sup>16</sup>, Rong Pan<sup>16</sup>, Qilian Jiang<sup>16</sup>, Jian Lan<sup>16</sup>, Yun Liu<sup>16</sup>, Liuping Wei<sup>16</sup>, Liyuan Zhou<sup>16</sup>, Ningyu Chen<sup>16</sup>, Ping Wang<sup>16</sup>, Fanwen Meng<sup>16</sup>, Yulu Qin<sup>16</sup>, Sisi Wang<sup>16</sup>. **Sichuan** Provincial CDC: Xianping Wu<sup>17</sup>, Ningmei Zhang<sup>17</sup>, Xiaofang Chen<sup>17</sup>, Xunfu Zhong<sup>17</sup>, Jiaqiu Liu<sup>17</sup>, Qiang Sun<sup>17</sup>. **Pengzhou** CDC: Guojin Luo<sup>18</sup>, Jianguo Li<sup>18</sup>, Xiaofang Chen<sup>18</sup>, Xunfu Zhong<sup>18</sup>, Jiaqiu Liu<sup>18</sup>, Qiang Sun<sup>18</sup>. **Gansu** Provincial CDC: Pengfei Ge<sup>19</sup>, Xiaolan Ren<sup>19</sup>, Caixia Dong<sup>19</sup>. **Maiji** CDC: Hui Zhang<sup>20</sup>, Enke Mao<sup>20</sup>, Zhongxiao Li<sup>20</sup>, Tao Wang<sup>20</sup>, Xi Zhang<sup>20</sup>. **Henan** Provincial CDC: Ding Zhang<sup>21</sup>, Gang Zhou<sup>21</sup>, Shixian Feng<sup>21</sup>, Liang Chang<sup>21</sup>, Lei Fan<sup>21</sup>. **Huixian** CDC: Yulian Gao<sup>22</sup>, Tianyou He<sup>22</sup>, Huarong Sun<sup>22</sup>, Pan He<sup>22</sup>, Chen Hu<sup>22</sup>, Xukui Zhang<sup>22</sup>. **Zhejiang** Provincial CDC: Min Yu<sup>23</sup>, Ruying Hu<sup>23</sup>, Hao Wang<sup>23</sup>, Weiwei Gong<sup>23</sup>, Meng Wang<sup>23</sup>. **Tongxiang** CDC: Chunmei Wang<sup>24</sup>, Xiaoyi Zhang<sup>24</sup>, Kaixu Xie<sup>24</sup>, Lingli Chen<sup>24</sup>, Dongxia Pan<sup>24</sup>, Qijun Gu<sup>24</sup>. **Hunan** Provincial CDC: Yuelong Huang<sup>25</sup>, Biyun Chen<sup>25</sup>, Li Yin<sup>25</sup>, Huilin Liu<sup>25</sup>, Zhongxi Fu<sup>25</sup>, Qiaohua Xu<sup>25</sup>. **Liuyang** CDC: Xin Xu<sup>26</sup>, Hao Zhang<sup>26</sup>, Huajun Long<sup>26</sup>, and Libo Zhang<sup>26</sup>.

## Affiliations:

- <sup>1</sup> Clinical Trial Service Unit and Epidemiological Studies, Nuffield Department of Population Health, University of Oxford, UK
- <sup>2</sup> Department of Engineering Science, University of Oxford, UK
- <sup>3</sup> Medical Research Council, Population Health Research Unit, University of Oxford, UK
- <sup>4</sup> Chinese Academy of Medical Sciences, Beijing, China
- <sup>5</sup> Department of Epidemiology and Biostatistics, School of Public Health, Peking University  
Health Sciences Center, Beijing, China, Peking University Center for Public Health and Epidemic Preparedness & Response, Beijing, China
- <sup>6</sup> China National Center For Food Safety Risk Assessment, Beijing, China
- <sup>7</sup> Qingdao CDC, Qingdao, Shangdong, China
- <sup>8</sup> Licang CDC, Licang District, Qingdao, Shandong, China
- <sup>9</sup> Heilongjiang CDC, Harbin, Heilongjiang, China
- <sup>10</sup> Nangang CDC, Nangang District, Harbin, Heilongjiang, China
- <sup>11</sup> Hainan CDC, Haikou, Hainan, China
- <sup>12</sup> Meilan CDC, Meilang District, Haikou, Hainan, China
- <sup>13</sup> Jiangsu CDC, Nanjing, Jiangsu, China
- <sup>14</sup> Suzhou CDC, Suzhou, Jiangsu, China
- <sup>15</sup> Guangxi CDC, Nanning, Guangxi, China
- <sup>16</sup> Liuzhou CDC, Liuzhou, Guangxi, China
- <sup>17</sup> Sichuan CDC, Chengdu, Sichuan, China
- <sup>18</sup> Pengzhou CDC, Pengzhou, Sichuan, China
- <sup>19</sup> Gansu CDC, Lanzhou, Gansu, China
- <sup>20</sup> Maiji CDC, Maiji, Tianshui, Gansu, China
- <sup>21</sup> Henan CDC, Zhengzhou, Henan, China
- <sup>22</sup> Huixian CDC, Huixian, Henan, China
- <sup>23</sup> Zhejiang CDC, Hanzhou Zhejiang, China
- <sup>24</sup> Tongxiang CDC, Tongxiang, Zhejiang, China
- <sup>25</sup> Hunan CDC, Changsha, Hunan, China
- <sup>26</sup> Liuyang CDC, Liuya

**Table: Variables included in the Cox regression analysis**

| Covariates                                             | Groups                                                                                                                                                                                                                                                                      |
|--------------------------------------------------------|-----------------------------------------------------------------------------------------------------------------------------------------------------------------------------------------------------------------------------------------------------------------------------|
| <b>Demographic and socioeconomic factors</b>           |                                                                                                                                                                                                                                                                             |
| <b>Age-at-risk</b>                                     | Five-year bands                                                                                                                                                                                                                                                             |
| <b>Sex</b>                                             | Male and female                                                                                                                                                                                                                                                             |
| <b>Region</b>                                          | Represents the ten regions of the China Kadoorie Biobank (CKB)                                                                                                                                                                                                              |
| <b>Area</b>                                            | This was categorised into rural and urban areas. The ten CKB regions include five urban and five rural areas.                                                                                                                                                               |
| <b>Season at recruitment</b>                           | Four seasons: Winter, Spring, Autumn, and Summer                                                                                                                                                                                                                            |
| <b>Marital status</b>                                  | Four groups: Never married, married, separated or divorced, and widowed                                                                                                                                                                                                     |
| <b>Highest level of education</b>                      | No formal education, primary education, middle school, and high school or higher                                                                                                                                                                                            |
| <b>Annual household income in Yuan</b>                 | Four groups: <10,000, 10,000 – 29,999, 30,000 – 34,999, or ≥ 35,000                                                                                                                                                                                                         |
| <b>Established cardiovascular disease risk factors</b> |                                                                                                                                                                                                                                                                             |
| <b>Physical activity</b>                               | Three groups: Tertiles of physical activity measured in Metabolic Equivalent of Task hours per day                                                                                                                                                                          |
| <b>Smoking</b>                                         | Three groups: Never smoker, ex-smoker smoker, and current smoker                                                                                                                                                                                                            |
| <b>Alcohol consumption</b>                             | Five groups: never regular drinker, ex-regular drinkers, reduced intake, occasional drinkers, and regular drinkers                                                                                                                                                          |
| <b>Body mass index (in kg/m<sup>2</sup>)</b>           | Four groups: Underweight, normal weight, overweight and obese                                                                                                                                                                                                               |
| <b>Hypertension</b>                                    | Two groups: Presence or absence of hypertension. Hypertension was defined as either a history of physician-diagnosed hypertension or the use of blood pressure (BP)-lowering medications or a systolic BP ≥140 mmHg or a diastolic BP ≥90 mmHg measured at baseline survey. |
| <b>Diabetes</b>                                        | Two groups: Diabetes and no diabetes                                                                                                                                                                                                                                        |

Reference: *Chen et al., China Kadoorie Biobank of 0.5 million people: survey methods, baseline characteristics and long-term follow-up, International Journal of Epidemiology, Volume 40, Issue 6, December 2011, Pages 1652–1666, <https://doi.org/10.1093/ije/dyr120>*

Supplementary Figure 1: Associations of fifths of resting heart rate with heart failure and pulmonary heart disease after excluding participants with prior diseases

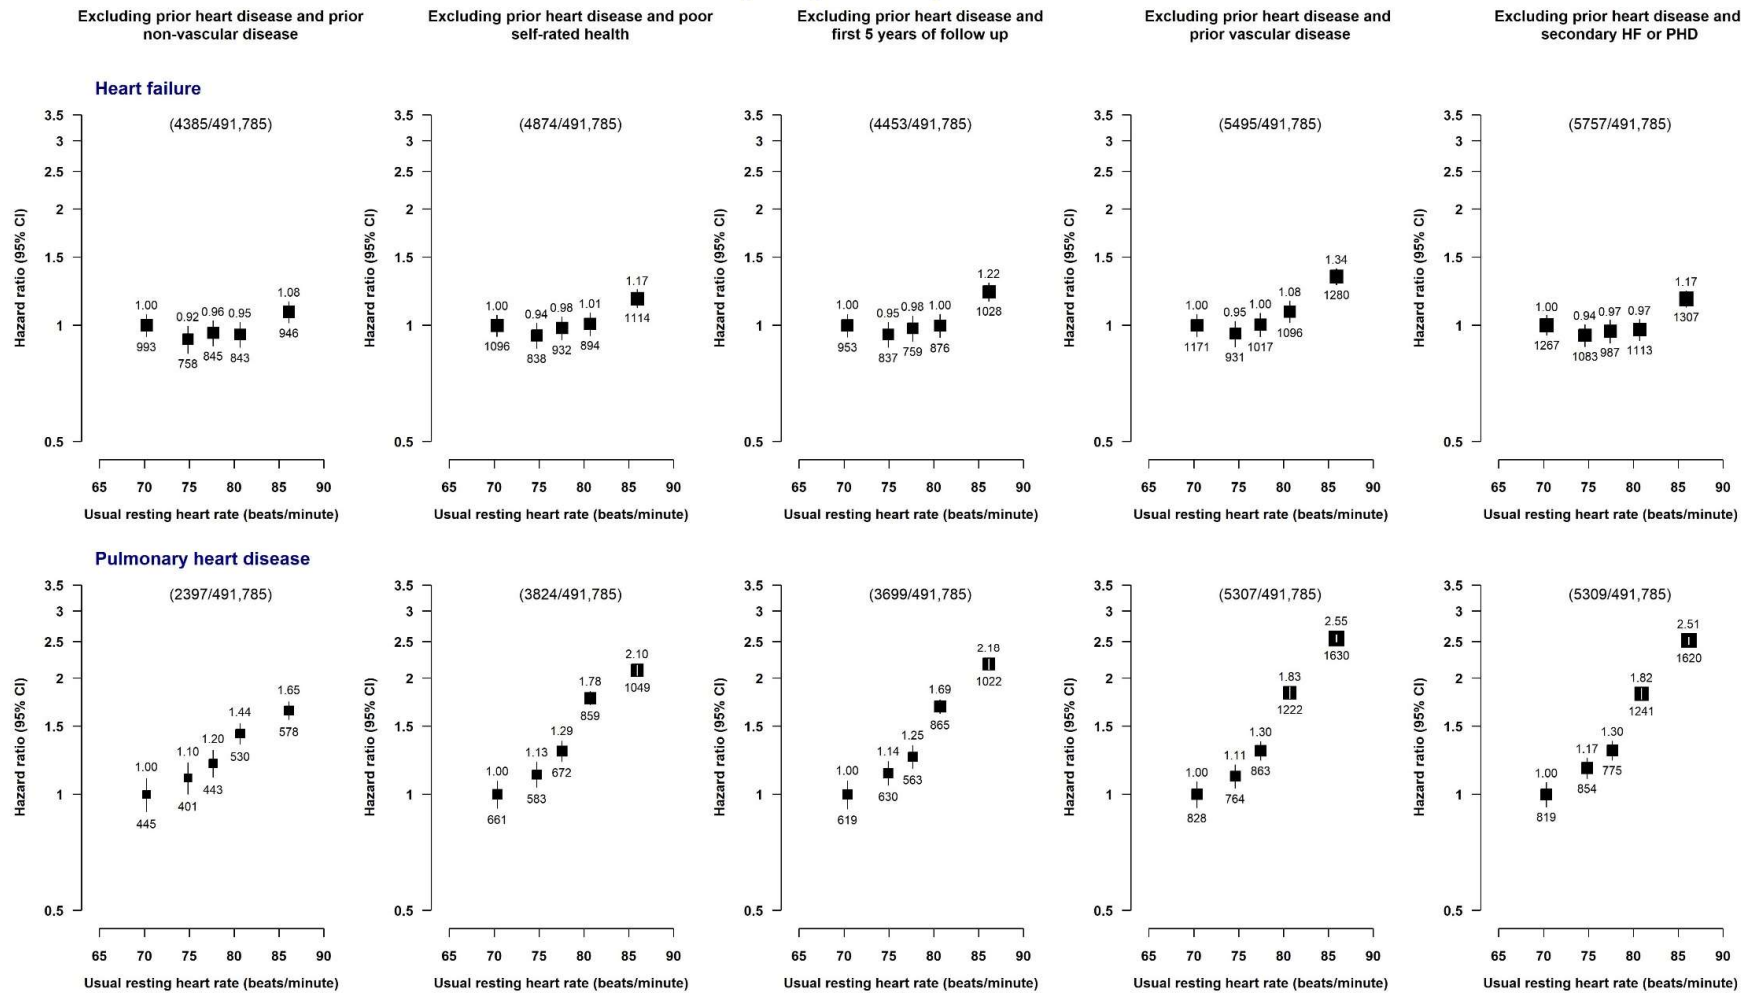

Supplement: openhrt-2022-001963supp001_data_supplement.pdf [file openhrt-2022-001963supp001_data_supplement.pdf]
